# Supplementary material for: Adsorptive dead-end filtration for removal of Cr(vi) using novel amine modified polyacrylonitrile ultrafiltration membranes
Source: Royal Society of Chemistry journal article supplement (doi:10.1039/d2ew00570k), 2022-01-01
Supplement: d2ew00570k1.pdf [file d2ew00570k1.pdf]

**Electronic supplementary information:**

**Adsorptive dead-end filtration for removal of Cr(VI) using novel amine modified polyacrylonitrile ultrafiltration membranes**

**Table S1:** Studies on removal of Cr(VI) with adsorptive UF membranes

| Membrane                                      | Method                                                                                        | Reference |
|-----------------------------------------------|-----------------------------------------------------------------------------------------------|-----------|
| Hydrolyzed PAN UF membrane                    | Ultrafiltration membrane for effective removal of chromium ions from potable water            | [1]       |
| Electrically conductive UF membrane           | Electrochemical removal of Cr(VI) by electrically conducting UF membranes                     | [2]       |
| Functionalized UF membranes                   | Removal of chromium ions by functional polymers in conjunction with ultrafiltration membranes | [3]       |
| PVA grafted to PAN membrane                   | Positively nanofibrous composite microfiltration membranes for removal of heavy metal ions    | [4]       |
| Amine-functionalized MCM-41 membrane          | Application of amine-functionalized MCM-41 modified UF membrane to remove Cr(VI)              | [5]       |
| ElectrospinnQuaternary amines on PAN membrane | Electrospun Weak Anion-Exchange Fibrous Membranes for Protein Purification                    | [6]       |

**Table S2:** Zeta potential of the pristine (PAN) and modified membranes (PAN-NH and PAN-Q) at pH 5.5, 7.0 and 8.5 used in the Cr(VI) adsorption experiments.

| Zeta potential at pH [mV] | 5.5         | 7.0         | 8.5         |
|---------------------------|-------------|-------------|-------------|
| PAN                       | -32.9 ± 0.1 | -34.4 ± 0.1 | -35.4 ± 0.4 |
| PAN-NH                    | +9.7 ± 0.2  | +2.4 ± 0.2  | -4.1 ± 0.6  |
| PAN-Q                     | +8.6 ± 0.2  | +9.1 ± 0.1  | +14.5 ± 1.0 |

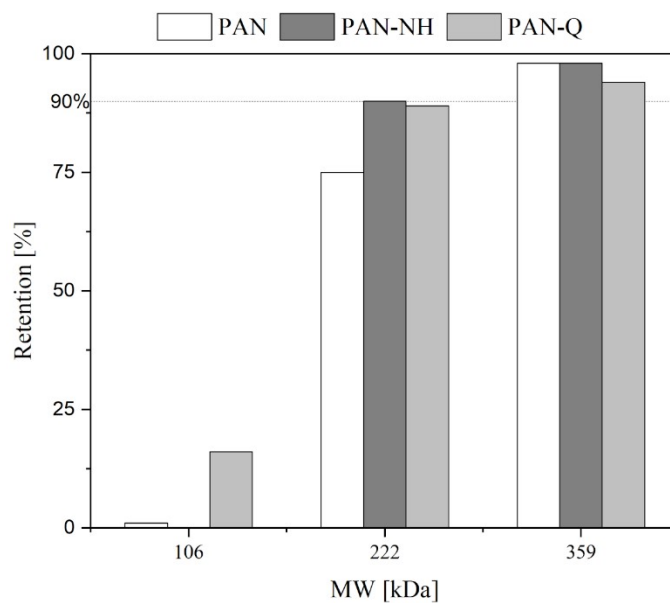

**Figure S1:** Determination of the MWCO of the PAN, PAN-NH and PAN-Q Membrane by measuring of the retention of different molecular weight standards. Filtration experiments were carried out in stirred dead-end cell with stirring speed of 300 rpm.

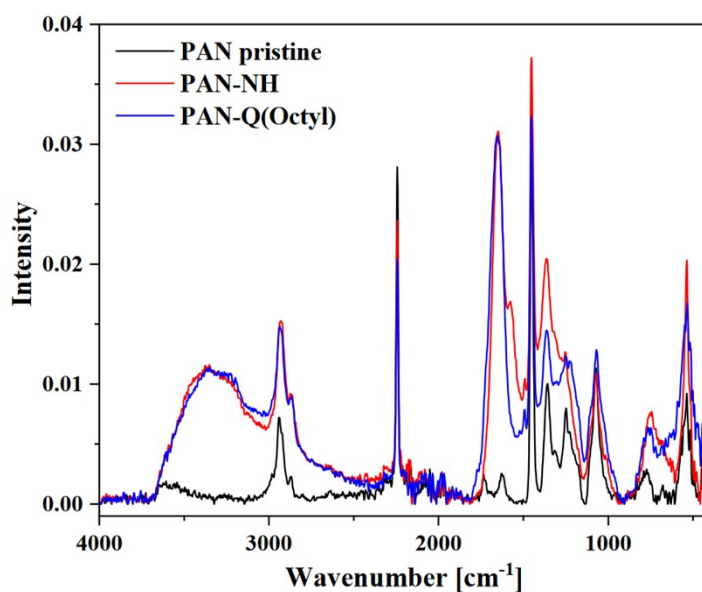

**Figure S2:** ATR-FTIR spectra of the pristine (black) membranes as well as the membranes modified with the primary amine (red) and the quaternary amine (blue).

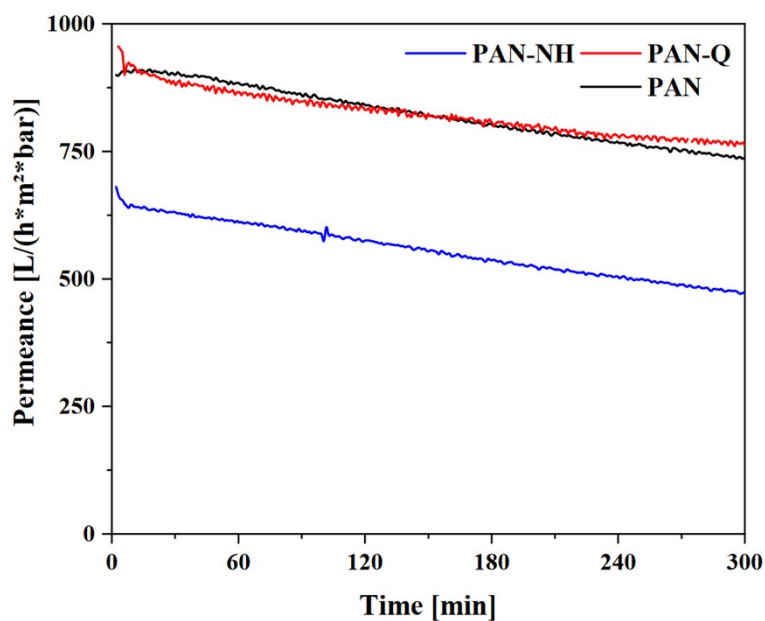

**Figure S3:** Water permeability of the pristine (black) and modified (red and blue) membranes over time.

**Table S3:** BET Surface of PAN membranes

| Modification | BET surface [m <sup>2</sup> /g] | Slope [g/mmol] | y-intercept [g/mmol] | C [-] | Q <sub>m</sub> [mmol/g] | Correlation coefficient |
|--------------|---------------------------------|----------------|----------------------|-------|-------------------------|-------------------------|
| PAN          | 13.07 ± 0.18                    | 7.43 ± 0.10    | 0.034 ± 0.005        | 215.1 | 0.134                   | 0.9998                  |
| PAN-NH       | 14.35 ± 0.09                    | 6.76 ± 0.04    | 0.044 ± 0.003        | 156.0 | 0.147                   | 0.9999                  |
| PAN-Q        | 13.23 ± 0.03                    | 0.32 ± 0.01    | 0.007 ± 0.001        | 48.3  | 0.136                   | 0.999                   |

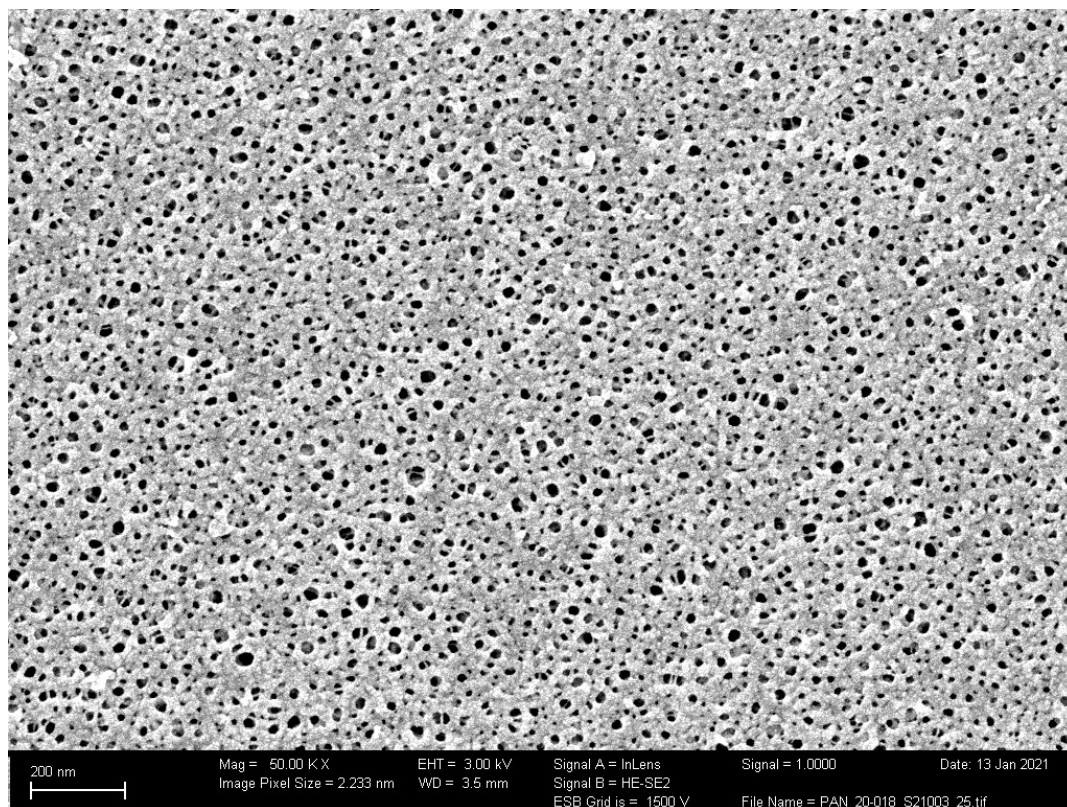

**Figure S4:** SEM figures of the active layer of the pristine PAN membrane

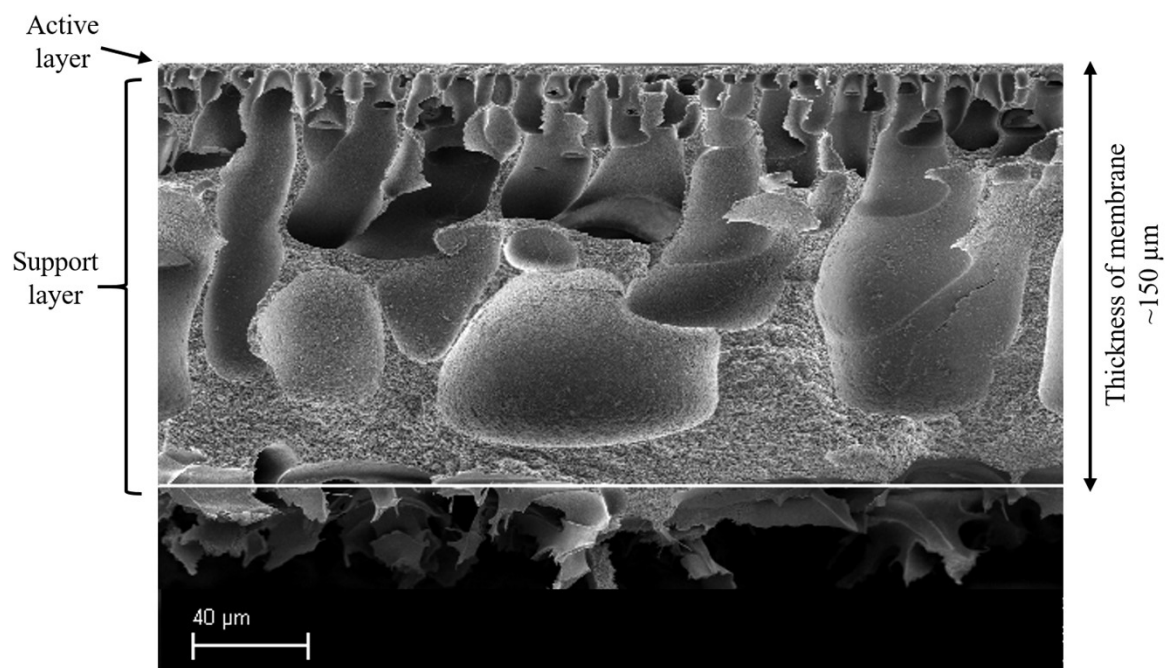

**Figure S5:** SEM figures of the cross-section of the pristine PAN membrane

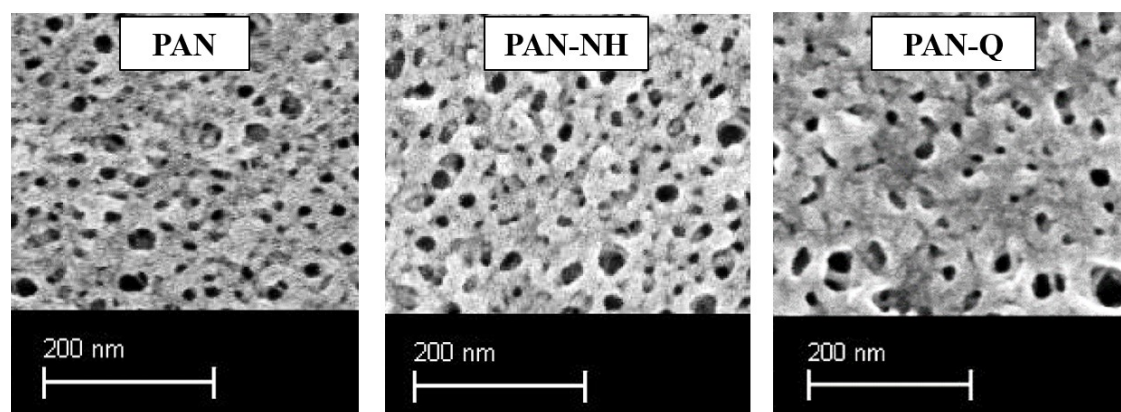

**Figure S6:** SEM figures of the active layer of pristine PAN, PAN-NH and PAN-Q membrane (batch 2).

## References

- [1] M.R. Muthumareeswaran, M. Alhoshan, G.P. Agarwal, Ultrafiltration membrane for effective removal of chromium ions from potable water, *Sci. Rep.* 7 (2017) 41423. <https://doi.org/10.1038/srep41423>.
- [2] W. Duan, G. Chen, C. Chen, R. Sanghvi, A. Iddya, S. Walker, H. Liu, A. Ronen, D. Jassby, Electrochemical removal of hexavalent chromium using electrically conducting carbon nanotube/polymer composite ultrafiltration membranes, *Journal of Membrane Science* 531 (2017) 160–171. <https://doi.org/10.1016/j.memsci.2017.02.050>.
- [3] J. Sánchez, C. Rodriguez, E. Oyarce, B.L. Rivas, Removal of chromium ions by functional polymers in conjunction with ultrafiltration membranes, *Pure and Applied Chemistry* 92 (2020) 883–896. <https://doi.org/10.1515/pac-2019-1103>.
- [4] X. Liu, B. Jiang, X. Yin, H. Ma, B.S. Hsiao, Highly permeable nanofibrous composite microfiltration membranes for removal of nanoparticles and heavy metal ions, *Separation and Purification Technology* 233 (2020) 115976. <https://doi.org/10.1016/j.seppur.2019.115976>.
- [5] Y. Bao, X. Yan, W. Du, X. Xie, Z. Pan, J. Zhou, L. Li, Application of amine-functionalized MCM-41 modified ultrafiltration membrane to remove chromium (VI) and copper (II), *Chemical Engineering Journal* 281 (2015) 460–467. <https://doi.org/10.1016/j.cej.2015.06.094>.
- [6] S.-T. Chen, S.R. Wickramasinghe, X. Qian, Electrospun Weak Anion-exchange Fibrous Membranes for Protein Purification, *Membranes (Basel)* 10 (2020). <https://doi.org/10.3390/membranes10030039>.
